# Supplementary material for: Communicating climate change adaptation information using web-based platforms
Source: Copernicus journal article supplement (doi:10.5194/asr-14-241-2017), 2017-07-14
Supplement: Supplementary file 1 [file asr-14-241-2017-supplement.pdf]

Supplement of Adv. Sci. Res., 14, 241–245, 2017  
<https://doi.org/10.5194/asr-14-241-2017-supplement>  
© Author(s) 2017. This work is distributed under  
the Creative Commons Attribution 3.0 License.

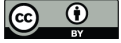

**Advances** in  
Science & Research  
Open Access Proceedings

*Supplement of*

## **Communicating climate change adaptation information using web-based platforms**

**Eleni Karali and Kati Mattern**

*Correspondence to:* Eleni Karali (ekarali8@gmail.com)

The copyright of individual parts of the supplement might differ from the CC BY 3.0 License.

**Supplement Table S1:** Overview of examined adaptation platforms

| Geographical scope | Adaptation platform                                                                                               | Year of launch | Background information                                                                                                                                                                                               |
|--------------------|-------------------------------------------------------------------------------------------------------------------|----------------|----------------------------------------------------------------------------------------------------------------------------------------------------------------------------------------------------------------------|
| <b>Austria</b>     | Klimawandelanpassung.at (Austrian Adaptation Platform)                                                            | 2009           | The platform has been operational since 2009 and then substantially updated and revised in 2013.                                                                                                                     |
| <b>Denmark</b>     | Klimatilpasning.dk (Danish National Adaptation Platform)                                                          | 2009           | The platform was launched in 2009 and continuously developed since then.                                                                                                                                             |
| <b>Finland</b>     | Climate Guide (Finnish Adaptation Platform)                                                                       | 2011           | The planning process started in 2009, while the platform became operational in 2011.                                                                                                                                 |
| <b>France</b>      | Observatoire National sur les Effets du Réchauffement Climatique (ONERC)<br>(French National Adaptation Platform) | 2006           | ONERC evolved into an adaptation portal in 2006, which was revised in 2009 to support the NAPCC.                                                                                                                     |
| <b>Germany</b>     | KomPass - Climate Impacts and Adaptation in Germany (German National Adaptation Platform)                         | 2008           | The platform was launched in 2008 as a follow-up of the NAS. The 2011 NAP required strengthening of the portal, which was then re-launched after improvements in 2013.                                               |
| <b>Hungary</b>     | Climate Dialogue Forum (Hungarian National Adaptation Platform)                                                   | 2013           | The Climate Dialogue Platform was launched in 2013.                                                                                                                                                                  |
| <b>Ireland</b>     | Climate Ireland (Irish National Adaptation Platform)                                                              | 2015           | A phased approach was followed for the development of the platform, starting from its planning in 2010, and working since then on the operationalization of the platform, which was launched in 2015.                |
| <b>Norway</b>      | Klimatilpasning.no (Norwegian Climate Adaptation Portal)                                                          | 2009           | Ministry of Climate & Environment established an adaptation working group in 2007, and launched a portal, Klimatilpasning.no, in March 2009.                                                                         |
| <b>Poland</b>      | KLIMADA Adaptation Platform (The Polish National Adaptation Platform)                                             | 2013           | The platform was developed as part of the KLIMADA project (2011–2013) and was launched in October 2013.                                                                                                              |
| <b>Spain</b>       | AdapteCCa.es (Spanish National Adaptation Platform)                                                               | 2013           | The idea of developing a platform originated in 2010. The platform was finally launched in 2013.                                                                                                                     |
| <b>Sweden</b>      | Klimatanpassning.se (Swedish Portal for Climate Change Adaptation)                                                | 2007           | The initial version of the portal was launched in 2007. Along with the set-up of the Swedish National Knowledge Centre for Climate Change Adaptation in 2012, an opportunity was provided to re-launch the platform. |

|                          |                                                                                                            |      |                                                                                                                                                                                                                                                         |
|--------------------------|------------------------------------------------------------------------------------------------------------|------|---------------------------------------------------------------------------------------------------------------------------------------------------------------------------------------------------------------------------------------------------------|
| <b>Switzerland</b>       | BAFU Thema Anpassung an den Klimawandel (Swiss Information Platform on Adaptation to Climate Change)       | 2012 | The mandate of the Federal Council was communicated in 2009. The process of the platform planning took place in 2010 and the platform was completed and launched in March 2012.                                                                         |
| <b>The Netherlands</b>   | Dutch Adaptation Knowledge/Spatial Adaptation Portal                                                       | 2014 | The first plans for the development of the platform started in December 2013, with the platform becoming operational in August 2014.                                                                                                                    |
| <b>United Kingdom</b>    | GOV.UK climate change adaptation pages (including Climate Ready Support Service by the Environment Agency) | 2000 | The UKCIP platform was launched in 2000 with continuous improvements and major updates in 2003, 2008, 2010 and 2013. The national responsibility for the platform was transferred to Environment Agency in 2012, and the GOV.UK launched in April 2013. |
| <b>Alpine Region</b>     | Klimaportal Alpenkonvention<br>Climate Adaptation Platform for the Alps (CAPA)                             | 2014 | The conceptual work for the development of the platform started in 2012 and the platform was launched in 2014. There is an additional portal on the Alpine Convention website supporting its Action Plan for Climate Change.                            |
| <b>Baltic Sea Region</b> | Baltic Sea Region (BSR)                                                                                    | 2013 | The implementation period of the Baltic Window lasted from 2011 to 2013. Baltic Window as part of Climate-ADAPT was launched in 2013.                                                                                                                   |
| <b>Pyrenees</b>          | Observatoire Pyrénéen du Changement Climatique; OPCC (Pyrenees Climate Change Observatory)                 | 2010 | The transnational platform for the Pyrenees was developed within the Pyrenees Observatory for Climate Change project 2010–2014.                                                                                                                         |
| <b>EU</b>                | European Climate Adaptation Platform (Climate-ADAPT)                                                       | 2012 | Identified as an integral component of White Paper, Climate-ADAPT was launched 2012.                                                                                                                                                                    |

(Source: Adapted from EEA, 2015a)
